# Supplementary material
Source: Royal Society of Chemistry journal article supplement (doi:10.1039/d6fo01006g)
Supplement: d6fo01006g1.pdf [file d6fo01006g1.pdf]

WT WT *Chd8*<sup>+/-</sup> WT WT *Chd8*<sup>+/-</sup> *Chd8*<sup>-/-</sup>

1000bp—  
500bp—

1000bp—  
500bp—

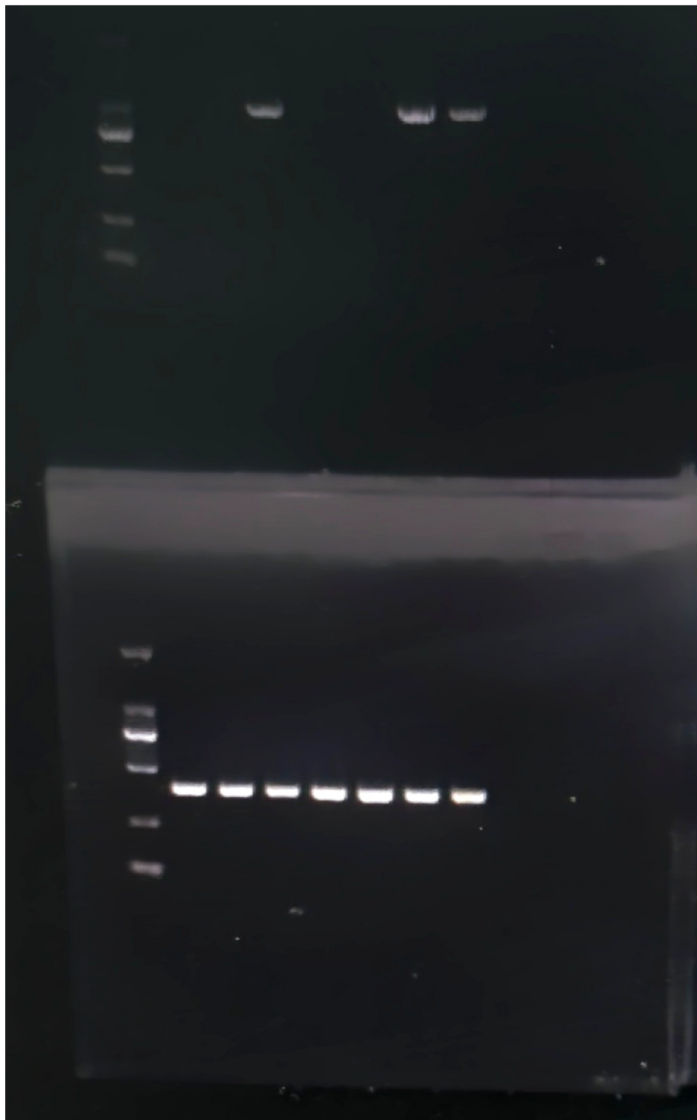

PCR raw tiff

WT *Chd8*<sup>+/-</sup> WT *Chd8*<sup>+/-</sup> WT *Chd8*<sup>+/-</sup> WT *Chd8*<sup>+/-</sup>

280kDa

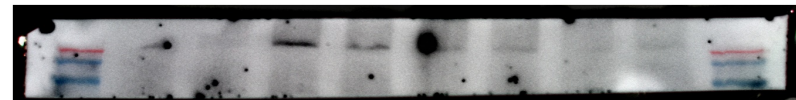

CHD8

55kDa

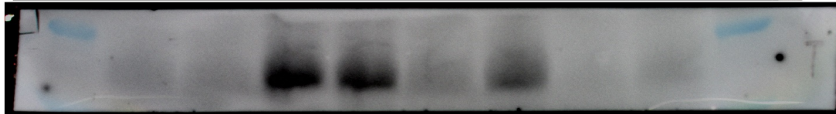

$\beta$ -Tubulin

36kDa

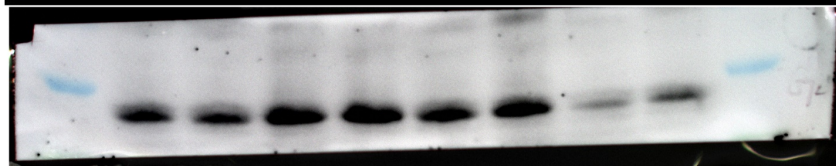

GAPDH

Western Blot raw tiff
