# Supplementary material
Source: Royal Society of Chemistry journal article supplement (doi:10.1039/d6fo01006g)
Supplement: d6fo01006g3.pdf [file d6fo01006g3.pdf]

These three TIFF images correspond to the Western Blot experiment shown in Figure 1C. The eight lanes from left to right represent the following samples: WT, *Chd8*<sup>+/-</sup>, WT, *Chd8*<sup>+/-</sup>, WT, *Chd8*<sup>+/-</sup>, WT, *Chd8*<sup>+/-</sup>. Due to the large molecular weight of the CHD8 protein (280 kDa), it required separate transfer to the membrane. Different antibodies were used for distinct proteins:  $\beta$ -Tubulin (55 kDa) and GAPDH (35 kDa), therefore, the three proteins are presented as three separate strips.

A

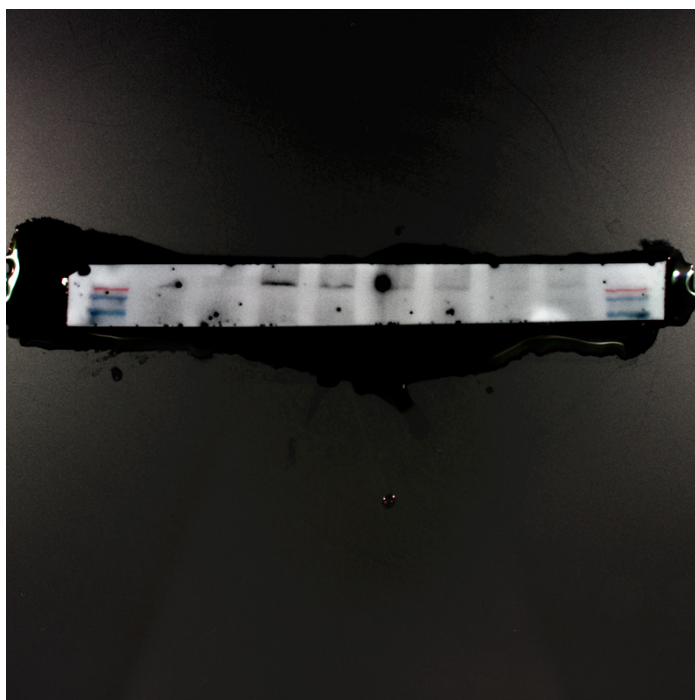

B

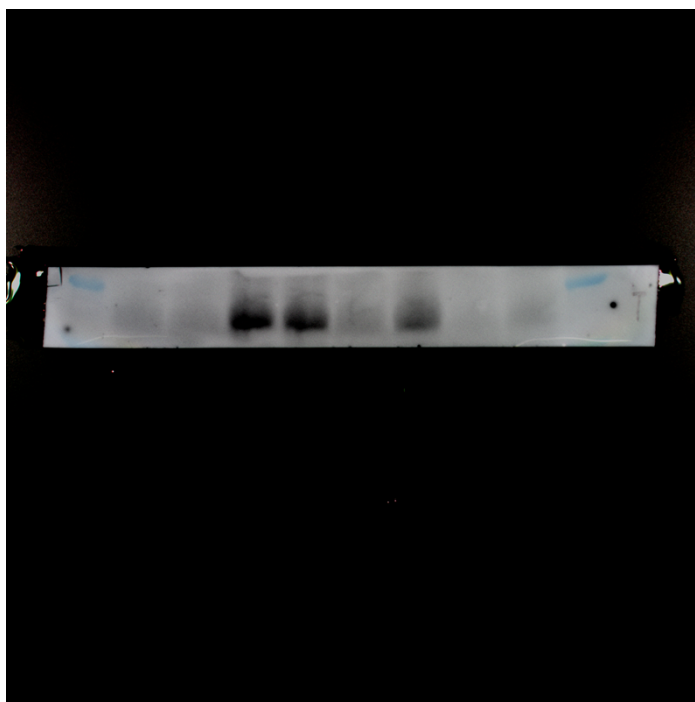

C

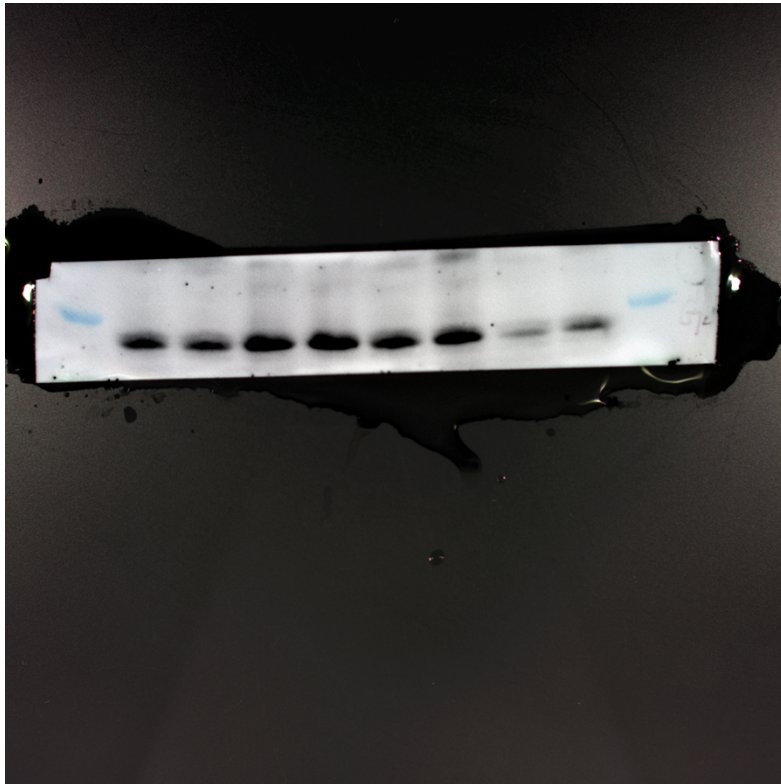

A represents CHD8 protein, B represents  $\beta$ -Tubulin protein, C represents GAPDH protein.
